# Supplementary material
Source: Springer Nature journal article supplement (https://www.springermedizin.de/resource/supplementary/13045_2010_120_MOESM2_ESM.pdf/9660696)

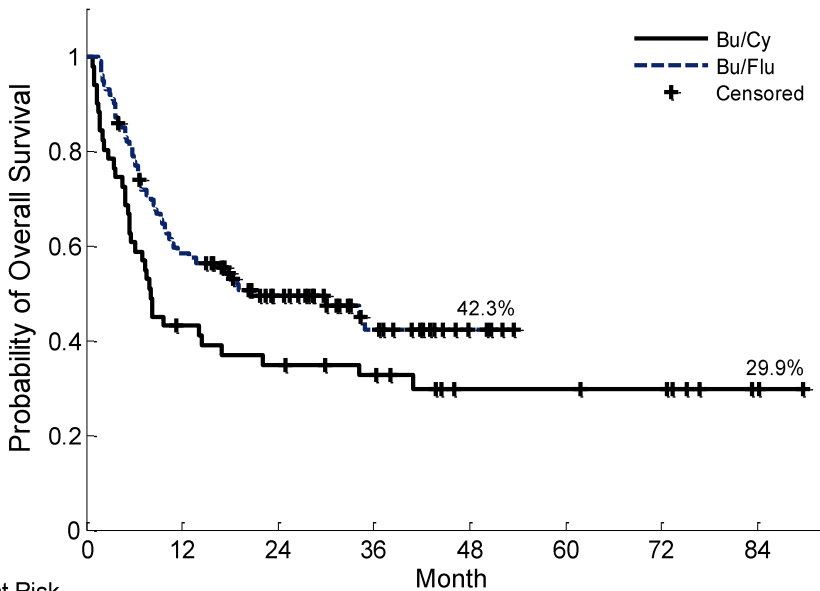

No. at Risk

Bu/Cy

51

21

17

14

8

8

7

2

Bu/Flu

100

57

34

16

4

0

0

0

Supplement: MOESM2 [file 9660696]
